# Supplementary material for: Microbial signature profiles of Penaeus vannamei larvae in low-survival hatchery tanks affected by vibriosis
Source: PeerJ journal article supplement (doi:10.7717/peerj.15795), 2023-09-01

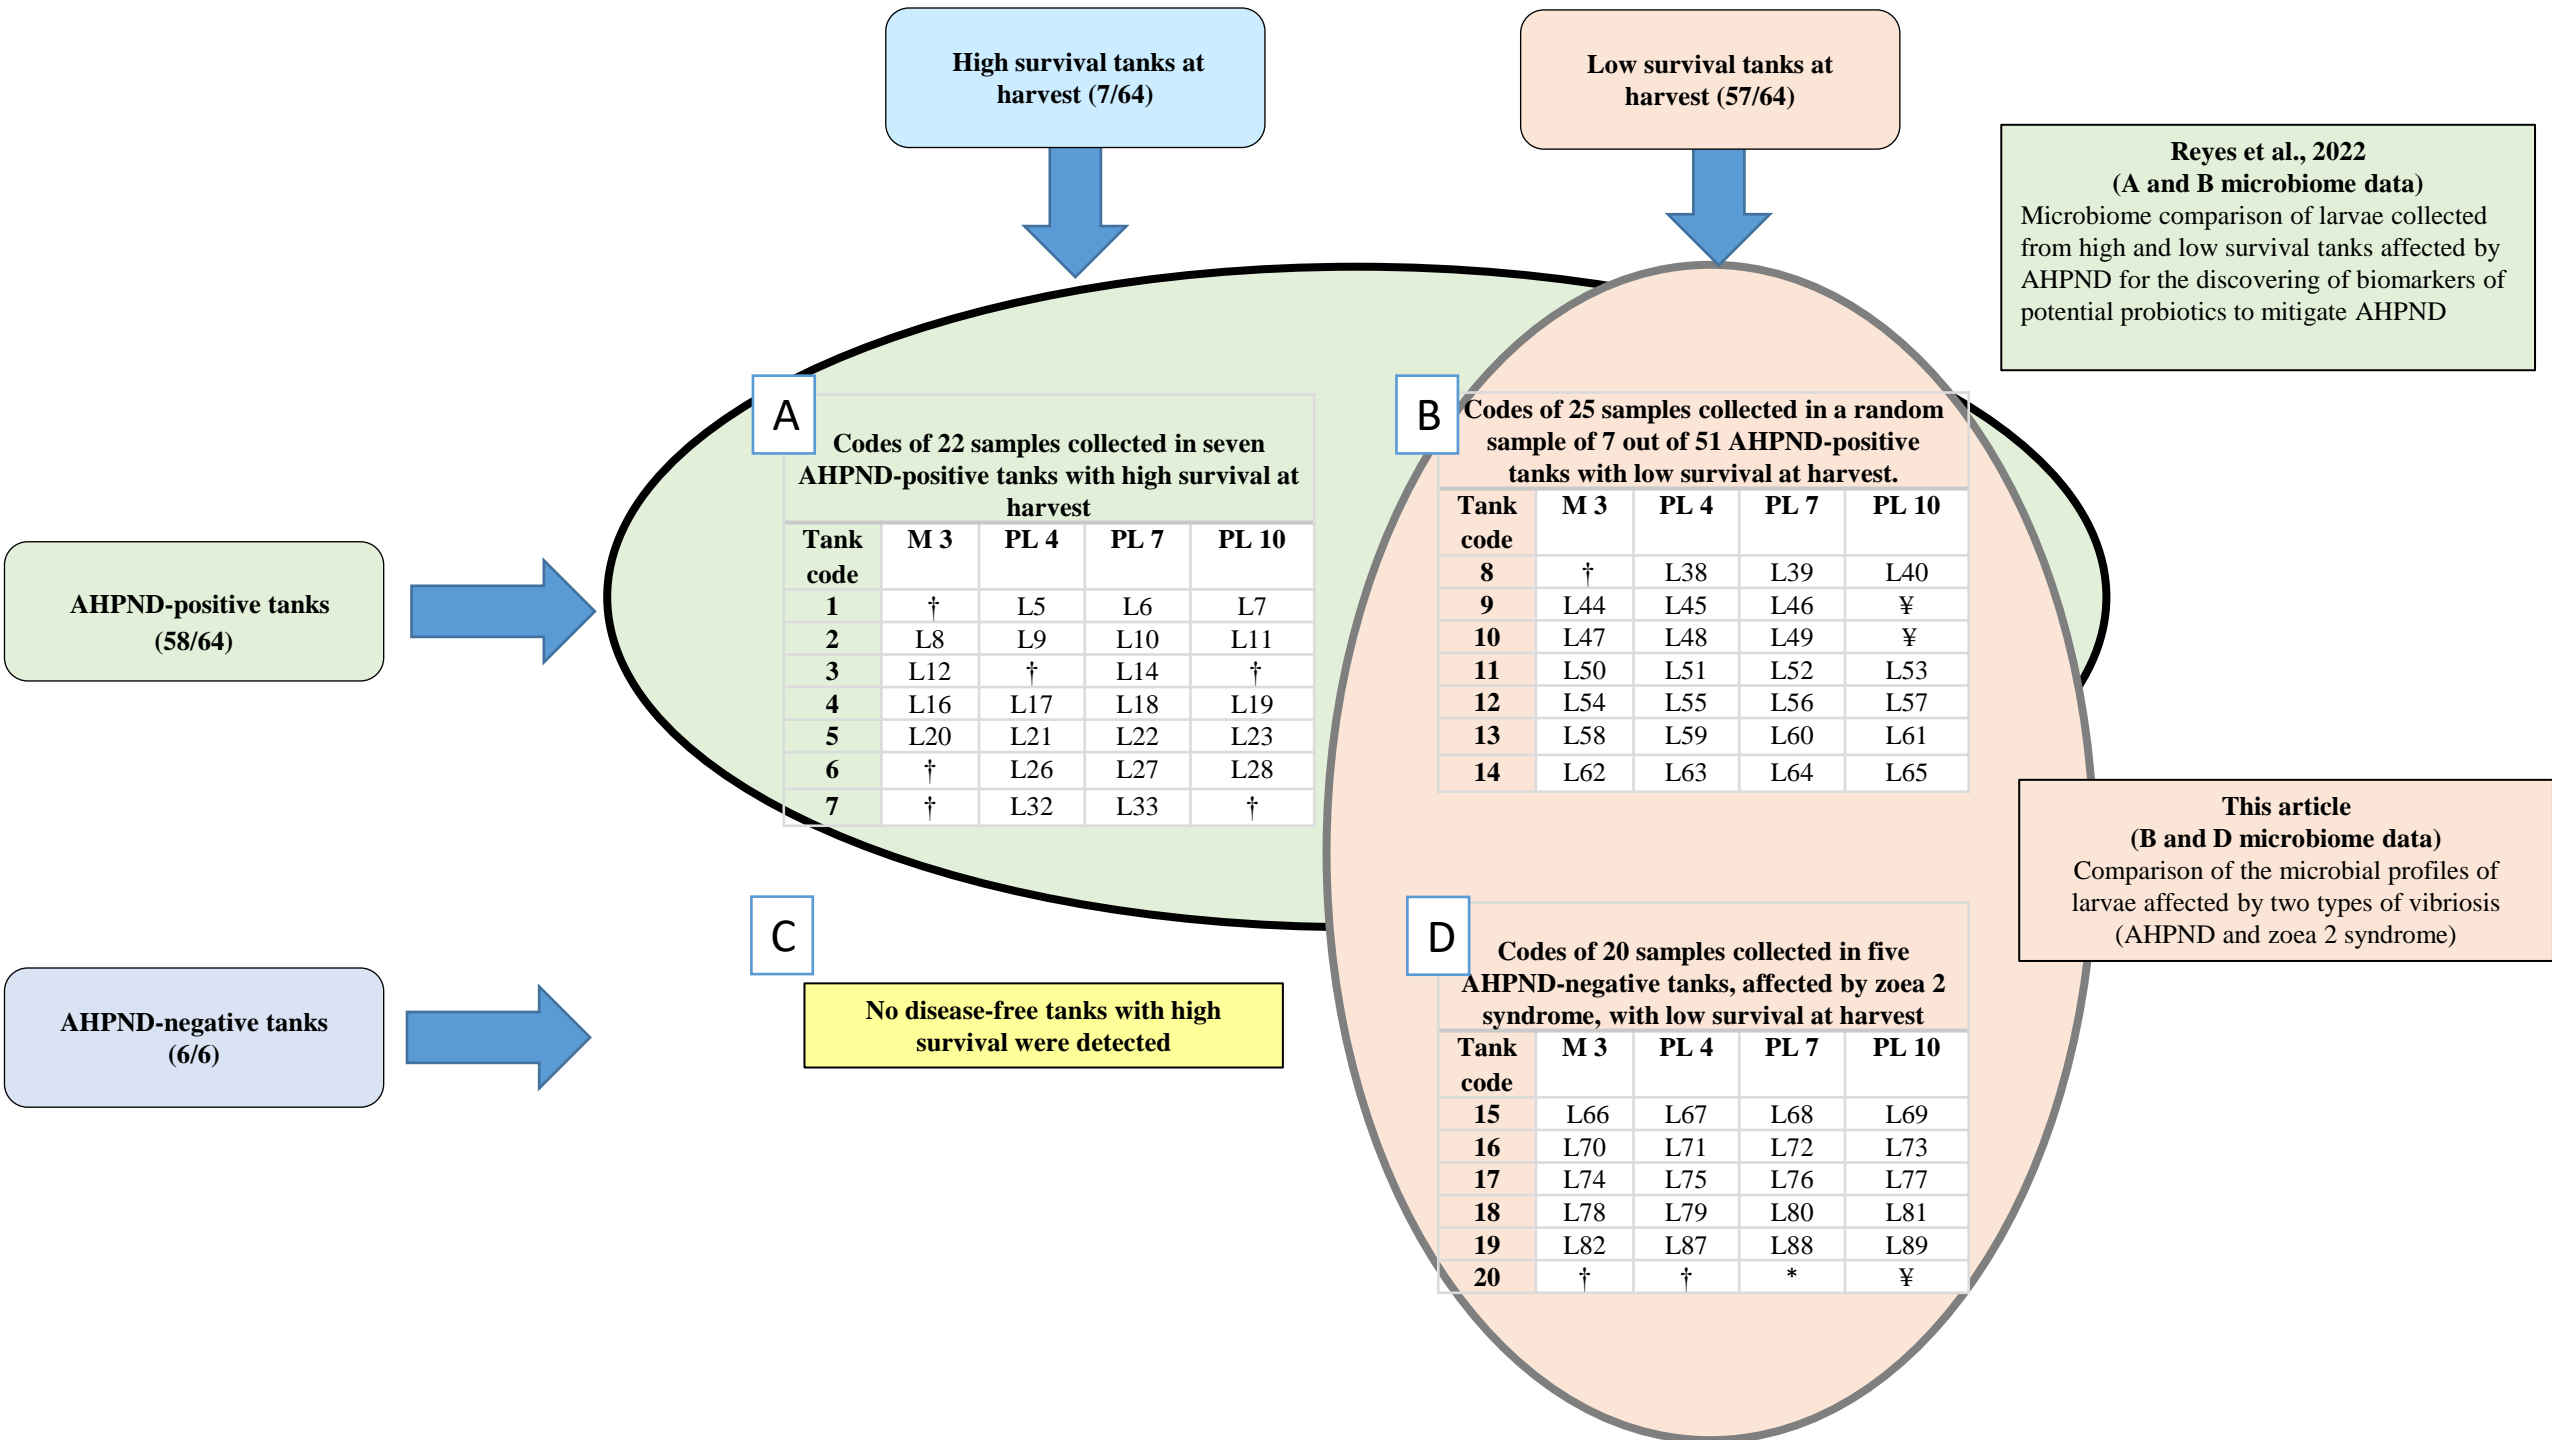

Supplement: Supplementary_Figure_1.pdf [file Supplementary_Figure_1.pdf]
